# Supplementary material
Source: PubMed Central journal article supplement (PMC1726721)
Supplement: emermedj_22_4_251_v2_1.pdf [file emermedj_22_4_251_v2_1.pdf]

**PHASE 2 – MEDICAL DATA**

|                                                                  |                                      |
|------------------------------------------------------------------|--------------------------------------|
| <b>DOCTOR NAME</b><br><br><b>GRADE</b><br><br><b>DATE / TIME</b> | <b>PLACE PATIENT ID STICKER HERE</b> |
|------------------------------------------------------------------|--------------------------------------|

**HISTORY** – *Significant history not recorded in Phase 1 including previously suspected legionella*

|                                                                                                              |                                                                                                                                                        |
|--------------------------------------------------------------------------------------------------------------|--------------------------------------------------------------------------------------------------------------------------------------------------------|
| <b>DRUG HISTORY</b> - <i>With doses</i><br><br><br><br><br><br><br><br><br><br><br><b>ALLERGIES</b> Yes / No | <b>PAST MEDICAL HISTORY</b><br><br>Diabetes / Cancer / Alcohol XS / Chronic illness / Immunosuppression / Renal disease / IHD / AF<br><br><b>OTHER</b> |
|--------------------------------------------------------------------------------------------------------------|--------------------------------------------------------------------------------------------------------------------------------------------------------|

**EXAMINATION**

**GENERAL IMPRESSION**                      looks well / flushed appearance / generally weak / looks toxic / delirium

**CVS**

**RS**

**GIT**

**CNS / PNS**

|                                                                                                                                                                                                                                                                                                                                                                                                                                                                                                                                                                                        |                                                                                                                                                                                                                                                                                                                                                                                                                                                       |
|----------------------------------------------------------------------------------------------------------------------------------------------------------------------------------------------------------------------------------------------------------------------------------------------------------------------------------------------------------------------------------------------------------------------------------------------------------------------------------------------------------------------------------------------------------------------------------------|-------------------------------------------------------------------------------------------------------------------------------------------------------------------------------------------------------------------------------------------------------------------------------------------------------------------------------------------------------------------------------------------------------------------------------------------------------|
| <b>INVESTIGATIONS &amp; RESULTS</b><br><br><b>Blood results</b> – <i>sign laboratory reports and write in below any significant abnormal results</i><br>FBC<br>Biochemistry<br><br><b>Urinalysis</b><br><br>Dipstick findings if done<br>Sent for urinary antigen    Yes / No    by A&E / GP<br><br><b>CXR</b> - Normal / lobar / multilobar / Pleural effusion / Bronchopneumonia<br><b>ECG</b> indicated                      Yes / No<br><b>ABG</b> indicated                      Yes / No    Time sent FiO2<br><b>Further investigations according to differential diagnoses:</b> | <b>LEGIONELLA RISK SUMMARY &amp; NOTIFICATION PATHWAY</b><br><br>Patient admitted / discharged<br><br>1 Legionella clinically diagnosed or suspected<br>2 Legionella remains clinically possible<br>3 Clinically excluded (state alternate diagnosis)<br>1 and 2 copy proforma to Public Health at FGH<br>1 – 3 if patient discharged copy with patient for GP<br><br><b>ALTERNATIVE DIAGNOSIS POSSIBLE? Yes/No</b><br>(Write differential diagnoses) |
|----------------------------------------------------------------------------------------------------------------------------------------------------------------------------------------------------------------------------------------------------------------------------------------------------------------------------------------------------------------------------------------------------------------------------------------------------------------------------------------------------------------------------------------------------------------------------------------|-------------------------------------------------------------------------------------------------------------------------------------------------------------------------------------------------------------------------------------------------------------------------------------------------------------------------------------------------------------------------------------------------------------------------------------------------------|

### PHASE 3 – MANAGEMENT

**PLACE PATIENT ID STICKER HERE**

**1) PATIENT ADMITTED**

|                                                                                                                                                                                       |          |
|---------------------------------------------------------------------------------------------------------------------------------------------------------------------------------------|----------|
| <b>TIME OF DECISION TO ADMIT</b>                                                                                                                                                      |          |
| <b>OXYGEN – AMOUNT/ METHOD OF DELIVERY</b>                                                                                                                                            |          |
| <b>LARGE IV CANNULA SITED</b>                                                                                                                                                         | Yes / No |
| <b>PRESCRIBE ANTIBIOTICS &amp; COMPLETE PRESCRIPTION CHART</b>                                                                                                                        |          |
| Clarithromycin 500mg BD (if IV give in 250mls or 500mls of 0.9%NaCl over 1 hour) <b>AND</b> Rifampicin 300mg BD (oral where possible)                                                 |          |
| <b>NOTE</b> - If patient is Clarithromycin intolerant prescribe Ciprofloxacin 500mg BD PO <b>OR</b> 400 mg BD IV)<br>- Check any interactions                                         |          |
| <b>PRESCRIBE ANTIPYRETICS</b>                                                                                                                                                         | Yes / No |
| <b>ARE ANALGESICS REQUIRED?</b>                                                                                                                                                       | Yes / No |
| <b>IV FLUIDS PRESCRIPTION</b> – start with 0.9% NaCl + 20 mmol KCl / litre                                                                                                            | Yes / No |
| <b>ALTERNATIVE DIAGNOSIS POSSIBLE? Yes/No</b><br>(Write treatment required for other conditions and continue in detail on casualty card or admission sheets of appropriate specialty) |          |

**2) PATIENT DISCHARGED**

|                                                                                         |                           |
|-----------------------------------------------------------------------------------------|---------------------------|
| <b>TIME OF DECISION TO DISCHARGE</b>                                                    |                           |
| <b>PRESCRIBE ANTIBIOTICS</b>                                                            |                           |
| Erythromycin 500mg 6 hourly X 10 days <b>OR</b> Ciprofloxacin 500mg 12 hourly x 10 days |                           |
| <b>GIVE PATIENT DISCHARGE LEAFLET</b>                                                   | Yes / No                  |
| <b>REVIEW ARRANGED</b>                                                                  | Yes / No                  |
| <b>TYPE</b>                                                                             | A&E / Medical clinic / GP |

|                  |                    |
|------------------|--------------------|
| <b>SIGNATURE</b> | <b>DATE / TIME</b> |
| <b>GRADE</b>     |                    |
